# Supplementary material for: Comparison of Tissue Factors in the Ontogenetic Aspects of Human Cholesteatoma
Source: MDPI journal article supplement (doi:10.3390/diagnostics14060662), 2024-03-21
Supplement: s1 [file s1]

**Figure S1** Negative control.

The example of test sample of the cholesteatoma: MMP2 negative control in cholesteatoma tissue. X 250.

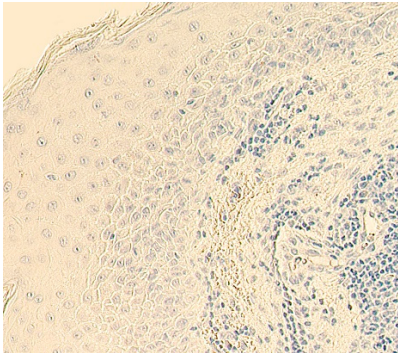

Positive controls in accordance with the manufacturer's guidelines and negative controls with exclusion of primary antibody were developed.

**Figure S2** Pictures of each criterion of semi-quantitative method.

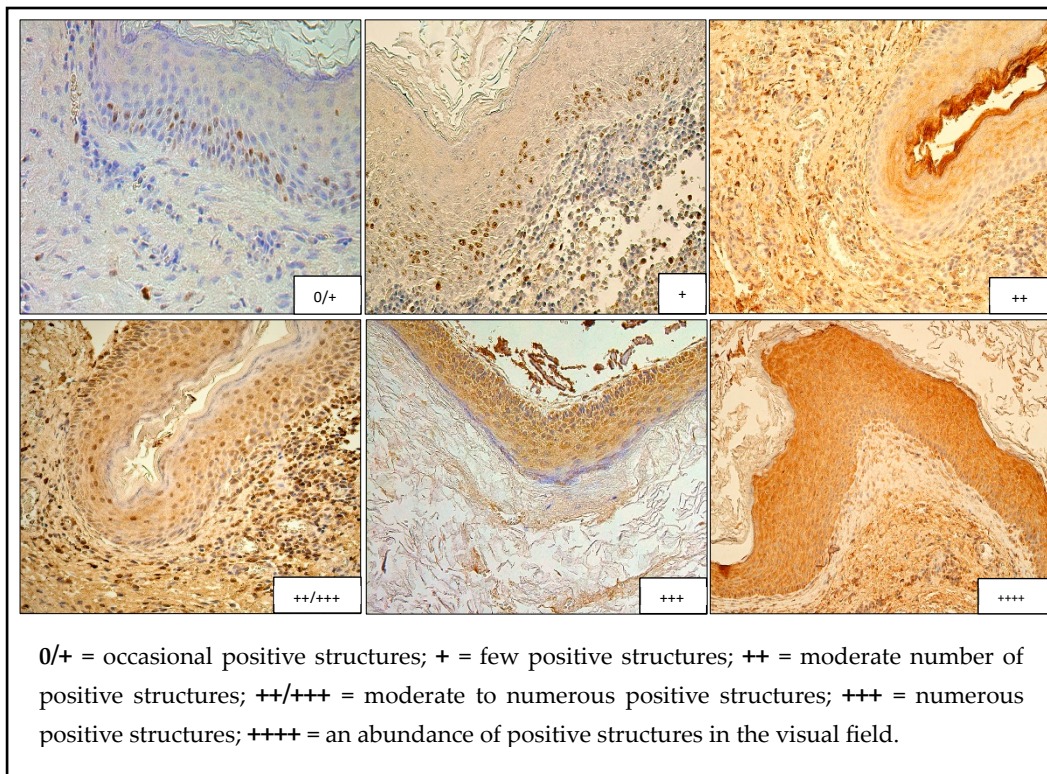

Table S1  
Complete table of relative tissue factor values in each group

1. Children group

|    | Gender | Age | Ki-67<br>M | Ki-67<br>P | MMP-2<br>M | MMP-2<br>P | TIMP-2<br>M | TIMP-2<br>P | IL-1<br>M | IL-1<br>P | IL-10<br>M | IL-10<br>P | HBD-2<br>M | HBD-2<br>P | HBD-4<br>M | HBD-4<br>P | Shh<br>M | Shh<br>P | MMP-9M | MMP-9P | TIMP-4M  | TIMP-4P  | NFKB<br>M | NFKB<br>P | VEGF<br>M | VEGF<br>P |
|----|--------|-----|------------|------------|------------|------------|-------------|-------------|-----------|-----------|------------|------------|------------|------------|------------|------------|----------|----------|--------|--------|----------|----------|-----------|-----------|-----------|-----------|
| 1  | M      | 11  | +          | +          | +/++       | +          | +/++        | 0/+         | +++       | +         | +++        | ++         | ++/+++     | ++         | +/++       | 0/+        | ++/+++   | ++       | 0/+    | 0/+    | ++/+++   | ++       | ++/+++    | ++        | ++/+++    | 0/+       |
| 2  | M      | 16  | +          | 0/+        | +          | 0/+        | 0           | 0/+         | +         | +         | +++        | +/++       | ++         | +/++       | 0/+        | +          | ++/+++   | ++       | 0/+    | 0-0/+  | ++/+++   | ++/+++   | ++        | +         | ++        | 0         |
| 3  | F      | 9   | 0          | 0          | 0          | 0          | 0           | 0           | 0         | 0/+       | 0          | 0/+        | 0          | 0          | 0          | 0/+        | 0        | 0        | 0      | 0      | +        | +/++     | 0/+       | 0/+       | ++        | 0         |
| 4  | M      | 17  | 0/+        | 0-0/+      | 0/+        | 0/+        | 0           | 0           | +         | 0/+       | ++         | +          | +/++       | +          | 0          | +          | +/++     | +        | 0      | 0-0/+  | ++       | ++       | ++        | +/++      | ++        | 0/+       |
| 5  | M      | 10  | 0-0/+      | 0-0/+      | ++         | ++         | 0           | 0/+         | ++        | +         | +/++       | ++         | +/++       | 0/+        | 0          | 0/+        | ++       | +/++     | 0/+    | 0/+    | +++/++++ | +++/++++ | ++/+++    | +         | +++       | ++        |
| 6  | F      | 16  | +          | 0/+        | +/++       | +/++       | +           | 0/+         | ++        | +/++      | ++         | +/++       | ++         | +          | 0          | 0/+        | +++      | ++/+++   | ++     | +/++   | +++/++++ | +++      | +++       | +/++      | +++/++++  | ++/+++    |
| 7  | F      | 16  | 0/+        | 0-0/+      | +          | +          | +/++        | 0/+         | ++        | +/++      | ++         | ++         | ++         | +/++       | 0          | 0-0/+      | ++/+++   | ++       | ++     | 0/+    | +++/++++ | +++      | ++        | +/++      | +++       | ++        |
| 8  | M      | 13  | ++         | 0/+        | +/++       | ++         | 0/+         | 0/+         | +++       | ++        | +++        | ++         | ++         | ++         | 0-0/+      | 0/+        | +++      | ++       | ++     | +/++   | +++/++++ | +++      | +++       | ++        | +++       | ++        |
| 9  | F      | 12  | 0-0/+      | 0          | ++         | +/++       | +/++        | 0-0/+       | ++/+++    | +         | ++/+++     | +          | ++         | +/++       | 0          | 0-0/+      | ++       | +        | 0      | 0      | ++/+++   | ++       | ++/+++    | 0/+       | ++        | 0/+       |
| 10 | F      | 15  | 0-0/+      | 0-0/+      | +/++       | +          | 0-0/+       | 0/+         | +         | 0/+       | ++         | +/++       | ++         | ++         | 0          | 0/+        | ++/+++   | +/++     | 0      | 0-0/+  | +++/++++ | ++       | ++        | 0/+       | ++        | +         |
| 11 | F      | 15  | 0          | 0          | +          | 0/+        | 0           | 0           | 0         | 0/+       | 0/+        | 0/+        | +          | 0/+        | 0          | 0/+        | +        | 0/+      | 0      | 0-0/+  | +/++     | +        | 0         | 0         | +         | 0         |
| 12 | M      | 15  | 0/+        | 0-0/+      | +/++       | 0/+        | 0/+         | 0           | ++        | 0/+       | +/++       | +          | +          | 0/+        | 0          | 0          | ++       | +/++     | +      | 0/+    | ++/+++   | ++       | ++        | 0/+       | ++        | 0         |
| 13 | M      | 6   | 0-0/+      | 0-0/+      | 0/+        | 0/+        | 0/+         | 0/+         | 0/+       | +/++      | 0/+        | 0/+        | +/++       | 0/+        | 0-0/+      | 0/+        | +/++     | +        | +      | +      | +/++     | +        | +/++      | +/++      | ++/+++    | +         |
| 14 | F      | 16  | 0/+        | 0          | ++/+++     | +++        | +++/++++    | +/++        | 0         | 0         | +/++       | 0          | +/++       | +/++       | +          | 0/+        | +++      | ++       | 0/+    | 0-0/+  | 0        | 0        | ++        | ++        | ++        | 0         |
| 15 | F      | 8   | 0/+        | 0-0/+      | ++         | ++         | 0           | 0           | 0         | 0/+       | +/++       | 0-0/+      | +/++       | +          | 0          | 0-0/+      | +++      | ++       | +      | 0-0/+  | +++/++++ | ++/+++   | ++        | ++        | ++        | 0/+       |
| 16 | M      | 6   | 0/+        | 0-0/+      | ++/+++     | ++/+++     | +++/++++    | ++          | +/++      | +         | ++         | +          | +          | 0/+        | 0/+        | 0-0/+      | +++      | ++       | 0      | 0/+    | +++      | ++/+++   | ++        | +/++      | ++        | 0/+       |
| 17 | F      | 5   | 0          | 0-0/+      | 0          | 0          | 0           | 0           | 0         | 0-0/+     | 0          | 0          | 0          | 0          | 0-0/+      | 0-0/+      | +        | +/++     | 0      | 0      | +/++     | +/++     | 0         | 0         | 0         | 0         |
| 18 | M      | 5   | 0/++       | 0/+        | +/++       | +/++       | 0           | 0           | 0/+       | 0/+       | 0          | 0/+        | 0/+        | 0/+        | ++/+++     | +/++       | +++      | +++      | 0      | 0-0/+  | ++/+++   | +/++     | ++        | 0/+       | 0/+       | 0-0/+     |
| 19 | M      | 15  | 0          | 0          | 0/+        | 0/+        | 0           | 0-0/+       | 0         | 0/+       | 0          | 0-0/+      | 0          | 0/+        | 0/+        | 0-0/+      | +/++     | +        | 0      | 0-0/+  | +/++     | +/++     | 0-0/+     | 0-0/+     | 0         | 0         |
| 20 | M      | 17  | +          | 0/+        | ++         | +/++       | +           | +           | ++        | 0/+       | 0/+        | 0/+        | +/++       | 0/+        | +/++       | 0/+        | +++      | ++/+++   | 0/+    | 0/+    | +++      | +/++     | ++/+++    | +         | +         | 0-0/+     |
| 21 | M      | 14  | +/++       | +/++       | +++        | ++/+++     | ++          | 0/+         | +++       | ++/+++    | ++/+++     | +          | ++         | +          | +++/++++   | +++        | +++/++++ | ++/+++   | +/++   | ++     | +++/++++ | ++/+++   | +++       | ++        | +/++      | 0/+       |
| 22 | F      | 13  | 0-0/+      | 0          | 0/+        | 0/+        | 0/+         | 0/+         | +/++      | +         | +/++       | ++         | +          | 0/+        | 0/+        | 0/+        | ++       | ++       | 0/+    | 0-0/+  | ++       | ++       | ++        | 0/+       | ++        | +         |
| 23 | M      | 14  | 0-0/+      | 0          | +/++       | 0/+        | +           | 0-0/+       | +/++      | 0/+       | +          | 0/+        | +/++       | 0-0/+      | +          | 0/+        | ++       | +        | +      | 0-0/+  | ++       | ++       | +         | 0-0/+     | +         | 0/+       |
| 24 | M      | 17  | 0-0/+      | 0-0/+      | +          | 0/+        | 0/+         | 0           | +         | 0/+       | ++         | 0/+        | +          | 0-0/+      | 0/+        | 0-0/+      | +        | 0/+      | 0/+    | 0-0/+  | +/++     | +/++     | 0/+       | 0         | +         | 0         |
| 25 | M      | 17  | 0/+        | 0-0/+      | ++/+++     | 0/+        | ++          | +           | +++       | +/++      | +++        | +          | ++/+++     | 0/+        | ++         | 0/+        | +++      | +        | ++     | 0/+    | +++      | ++/+++   | +++       | +/++      | ++/+++    | +         |

| 2. Adult group |        |     |            |            |            |            |             |             |           |           |            |            |            |                |            |                |          |          |            |            |             |         |           |           |           |           |
|----------------|--------|-----|------------|------------|------------|------------|-------------|-------------|-----------|-----------|------------|------------|------------|----------------|------------|----------------|----------|----------|------------|------------|-------------|---------|-----------|-----------|-----------|-----------|
|                | Gender | Age | Ki-67<br>M | Ki-67<br>P | MMP-2<br>M | MMP-2<br>P | TIMP-2<br>M | TIMP-2<br>P | IL-1<br>M | IL-1<br>P | IL-10<br>M | IL-10<br>P | HBD-2<br>M | HBD-<br>2<br>P | HBD-4<br>M | HBD-<br>4<br>P | Shh<br>M | Shh<br>P | MMP-<br>9M | MMP-<br>9P | TIMP-<br>4M | TIMP-4P | NFKB<br>M | NFKB<br>P | VEGF<br>M | VEGF<br>P |
| 1              | F      | 58  | +          | +          | +/+++      | +/+        | +++         | +           | +/+       | +         | +/+++      | ++         | +/+++      | ++             | ++         | +              | +++      | ++       | 0          | 0/++       | +/+         | +++     | ++        | +++       | +/+++     | 0/+       |
| 2              | M      | 46  | 0/+        | 0-0/+      | +/+        | +/+        | 0           | 0           | +/+       | +         | +          | +          | ++         | ++             | 0          | ++             | +/+++    | ++       | 0/+        | 0/+        | +/+         | +/+     | +/+       | +         | +         | 0         |
| 3              | M      | 23  | 0-0/+      | 0-0/+      | 0          | +          | 0/+         | +/+         | +/+++     | +++       | +++        | +++        | ++         | +/+            | +          | 0/+            | ++       | ++       | 0/+        | 0/+        | +/+++       | +/+++   | ++        | ++        | +/+       | 0/+       |
| 4              | M      | 38  | +          | 0/++       | +/+        | 0/+        | 0/+         | 0/+         | +++       | +/+       | +++        | ++         | +/+++      | ++             | +/+        | +              | +/+++    | ++       | 0/+        | 0/+        | +/+++       | +/+++   | +++       | +++       | +/+++     | 0         |
| 5              | F      | 75  | 0/+        | 0/+        | 0/+        | +/+        | 0           | 0/+         | ++        | +/+       | ++         | ++         | ++         | +/+            | 0/+        | 0/+            | ++       | +/+      | 0          | 0/++       | +/+++       | ++      | ++        | ++        | ++        | 0         |
| 6              | F      | 28  | 0/+        | +/+        | 0/+        | +          | 0-0/+       | 0-0/+       | ++        | ++        | +/+        | ++         | +/+        | +              | 0          | 0-0/+          | +/+      | ++       | +          | +          | +++         | +++     | ++        | ++        | +++       | ++        |
| 7              | F      | 31  | +          | 0-0/+      | +          | 0/+        | 0-0/+       | 0-0/+       | 0/+       | 0/+       | +/+        | +          | +          | +              | 0-0/+      | 0-0/+          | ++       | ++       | +/+        | 0/++       | +/++++      | +++     | +/+++     | ++        | +/+++     | 0/+       |
| 8              | M      | 38  | 0/+        | 0/+        | +/+        | +          | +/+         | 0/+         | +/+       | +         | +/+++      | +/+        | ++         | +              | 0          | 0-0/+          | +++      | +        | 0          | 0/+        | +/+++       | ++      | ++        | 0/+       | +/+++     | +/+       |
| 9              | M      | 26  | +          | +          | +          | +/+        | 0/+         | 0/+         | +/+       | ++        | +/+        | +/+        | +/+        | +/+            | 0          | 0-0/+          | ++       | +/+++    | 0/+        | +          | +/+++       | +++     | +         | ++        | +         | +         |
| 10             | M      | 39  | 0/+        | 0          | 0-0/+      | 0-0/+      | 0           | 0           | 0/+       | 0-0/+     | 0/+        | 0/+        | +          | 0              | 0          | 0              | +        | 0/+      | 0          | 0          | ++          | +/+     | +         | 0         | +/+       | 0         |
| 11             | F      | 22  | 0-0/+      | 0/+        | ++         | ++         | ++          | ++          | ++        | +/+       | +/+++      | ++         | +/+++      | +              | 0          | 0-0/+          | +/+++    | +/+      | +          | +          | +/+++       | ++      | +++       | ++        | +/+++     | +/+       |
| 12             | M      | 19  | 0-0/+      | 0          | +/+        | +/+        | ++          | ++          | ++        | +         | +/+++      | ++         | +/+        | +              | 0          | 0-0/+          | +++      | +        | +          | 0/+        | +++         | ++      | ++        | +/+       | +/+++     | ++        |
| 13             | F      | 45  | 0/+        | 0          | ++         | ++         | 0           | 0           | 0         | 0         | 0/+        | 0/+        | 0/+        | 0/+            | 0          | 0              | +/+      | ++       | 0          | 0-0/+      | 0           | 0       | +         | 0         | +/+       | 0         |
| 14             | F      | 24  | +          | 0          | ++         | +/+        | 0           | 0-0/+       | 0         | 0         | +          | 0/+        | +          | +              | +          | +              | +++      | +/+++    | 0          | 0          | +/+++       | +/+     | +/+       | 0/+       | +/+++     | 0/+       |
| 15             | M      | 39  | 0/++       | 0-0/+      | +/+++      | +/+        | 0/+         | 0-0/+       | 0/+       | +/+       | 0          | 0/+        | +          | 0-0/+          | ++         | 0/+            | +++      | ++       | 0          | 0-0/+      | +++         | ++      | +/+++     | 0/+       | 0-0/+     | 0-0/+     |
| 16             | F      | 40  | 0-0/+      | 0/+        | ++         | +/+        | +/+         | 0-0/+       | +/+       | 0/+       | 0/+        | 0-0/+      | +/+        | 0-0/+          | ++         | 0/+            | +++      | +/+      | 0          | 0/+        | +++         | +/+     | ++        | 0-0/+     | 0-0/+     | 0/+       |
| 17             | F      | 27  | +/+        | +/+        | +/++++     | +++        | +/+++       | 0/+         | 0         | +         | 0          | +          | +          | ++             | +++        | +/+            | ++++     | +++      | 0          | 0/+        | +/++++      | ++      | +++       | 0/+       | +/+       | +/+       |
| 18             | F      | 41  | 0/+        | 0-0/+      | ++         | +          | +           | 0-0/+       | +/+       | 0-0/+     | +          | 0-0/+      | +/+        | 0/+            | +/+        | 0-0/+          | +/+++    | ++       | 0/+        | 0-0/+      | +++         | ++      | ++        | 0-0/+     | 0/+       | 0-0/+     |
| 19             | F      | 32  | 0-0/+      | 0/+        | +/+        | +          | 0           | 0-0/+       | 0         | +/+       | 0          | 0          | +          | 0/+            | 0          | 0-0/+          | +++      | +/+      | 0/+        | 0/+        | +++         | ++      | +/+       | +         | 0-0/+     | 0/+       |
| 20             | M      | 41  | 0/+        | 0-0/+      | +/+++      | +/+        | ++          | 0/+         | ++        | +         | +++        | +/+        | ++         | 0/+            | 0-0/+      | 0-0/+          | +++      | ++       | +/+        | 0-0/+      | +/+++       | ++      | +/+++     | 0/+       | +/+++     | +         |
| 21             | F      | 74  | 0/++       | 0/+        | +/+        | +          | +           | 0/+         | ++        | +         | ++         | +/+        | ++         | +              | 0/+        | 0/+            | ++       | +        | +/+        | 0/+        | +++         | +/+++   | +/+       | 0/+       | +/+       | 0/+       |
| 22             | M      | 26  | 0-0/+      | 0          | +/+        | 0/+        | +/+         | +           | +/+       | +         | +/+++      |            |            |                |            |                |          |          |            |            |             |         |           |           |           |           |

| 3. Control group |  |     |            |            |            |            |             |             |           |           |            |            |            |            |            |            |          |          |        |        |         |         |           |           |           |           |
|------------------|--|-----|------------|------------|------------|------------|-------------|-------------|-----------|-----------|------------|------------|------------|------------|------------|------------|----------|----------|--------|--------|---------|---------|-----------|-----------|-----------|-----------|
|                  |  |     | Ki-67<br>M | Ki-67<br>P | MMP-2<br>M | MMP-2<br>P | TIMP-2<br>M | TIMP-2<br>P | IL-1<br>M | IL-1<br>P | IL-10<br>M | IL-10<br>P | HBD-2<br>M | HBD-2<br>P | HBD-4<br>M | HBD-4<br>P | Shh<br>M | Shh<br>P | MMP-9M | MMP-9P | TIMP-4M | TIMP-4P | NFKB<br>M | NFKB<br>P | VEGF<br>M | VEGF<br>P |
|                  |  | Age | E          | CT         | E          | CT         | E           | CT          | E         | CT        | E          | CT         | E          | CT         | E          | CT         | E        | CT       | E      | CT     | E       | CT      | E         | CT        | E         | CT        |
| 1                |  | -   | 0          | 0          | 0/+        | +          | 0/+         | +           | +         | 0/+       | +          | +          | +          | 0/+        | +          | 0/+        | 0        | 0        | 0/+    | 0/+    | ++      | +       | 0         | 0-0/+     | ++/+++    | +         |
| 2                |  | -   | 0          | 0          | 0          | +          | +           | +           | 0         | +         | ++         | ++         | +          | 0          | +          | 0/+        | ++       | +        | +/++   | +      | ++/+++  | ++      | 0/+       | 0/+       | ++/+++    | +         |
| 3                |  | -   | 0          | 0          | 0          | 0/+        | +           | 0           | 0/+       | +         | ++         | ++         | 0-0/+      | 0          | +/++       | +          | 0/+      | 0        | 0/+    | 0/+    | +/++    | +/++    | 0         | 0         | ++        | 0/+       |
| 4                |  | -   | 0-0/+      | 0-0/+      | +++        | +          | ++/+++      | +           | 0/+       | 0/+       | ++/+++     | ++         | ++         | 0/+        | +          | 0/+        | +++/++++ | +        | +/++   | 0-0/+  | ++/+++  | ++      | +         | 0/+       | +++       | +/++      |
| 5                |  | -   | 0          | 0          | ++/+++     | +          | ++/+++      | +           | 0         | 0/+       | ++/+++     | ++         | ++         | 0/+        | ++         | +          | +++/++++ | +        | +/++   | +/++   | +++     | ++      | ++        | +/++      | +++       | +         |
| 6                |  | -   | 0-0/+      | 0-0/+      | +          | +          | ++          | 0/+         | +         | 0/+       | +          | 0/+        | 0/+        | 0          | +          | 0/+        | +/++     | 0/+      | +      | 0/+    | ++/+++  | ++      | +         | 0/+       | ++        | 0/+       |
| 7                |  | -   | 0          | 0          | 0/+        | +          | +/++        | 0/+         | +/++      | +         | +/++       | +          | 0/+        | 0-0/+      | +          | 0          | 0/+      | +        | +      | 0/+    | +       | +       | 0/+       | 0         | ++        | 0         |

Abbreviations: M—matrix; P—perimatrix; E—epithelium; CT—connective tissue; HβD-2—human beta defensin 2; HβD-4—human beta defensin 4; IL-1—interleukin 1; IL-10—interleukin 10; Ki-67—proliferation marker; NF-κβ—nuclear factor kappa beta; VEGF—vascular endothelial growth factor; Shh—Sonic hedgehog gene protein; MMP-2—matrix metalloproteinase 2; MMP-9—matrix metalloproteinase 9; TIMP-2—tissue inhibitor of metalloproteinase-2; TIMP-4—tissue inhibitor of metalloproteinase-4; 0 = no positive structures, 0-0/+ = no to occasional positive structures, 0/+ = occasional positive structures, 0/++= occasional-to-few positive structures, + = few positive structures, +/+ = few-to-moderate number of positive structures, ++ = moderate number of positive structures, ++/+++ = moderate-to-numerous positive structures, +++ = numerous positive cells, +++/++++ = numerous-to-abundant structures, ++++ = abundance of positive structures in the visual field.

Supplementary file

Table S2

Adult group correlations

| Spearman's rho |                         | MMP-2 M                 | MMP-2 P         | MMP-9M | MMP-9P | TIMP-2 M | TIMP-2 P | TIMP-4M | TIMP-4P | Shh M  | Shh P  | IL-1 M | IL-1 P | IL-10 M | IL-10 P | NFKB M | NFKB P | Ki-67 M | Ki-67 P | VEGF M | VEGF P | HBD-2 M | HBD-2 P | HBD-4 M | HBD-4 P |
|----------------|-------------------------|-------------------------|-----------------|--------|--------|----------|----------|---------|---------|--------|--------|--------|--------|---------|---------|--------|--------|---------|---------|--------|--------|---------|---------|---------|---------|
|                |                         | Correlation Coefficient | Sig. (2-tailed) |        |        |          |          |         |         |        |        |        |        |         |         |        |        |         |         |        |        |         |         |         |         |
| MMP-2 P        | N                       | 25                      | 25              | 25     | 25     | 25       | 25       | 25      | 25      | 25     | 25     | 25     | 25     | 25      | 25      | 25     | 25     | 25      | 25      | 25     | 25     | 25      | 25      | 25      | 25      |
|                | Correlation Coefficient | .574**                  | 1.000           | -0.293 | 0.156  | 0.198    | 0.035    | 0.029   | -0.114  | .453*  | .460*  | -0.100 | 0.088  | -0.111  | 0.131   | 0.169  | 0.090  | 0.078   | 0.275   | 0.014  | 0.219  | -0.029  | 0.344   | 0.054   | 0.189   |
|                | Sig. (2-tailed)         | 0.003                   |                 | 0.156  | 0.456  | 0.344    | 0.866    | 0.892   | 0.587   | 0.023  | 0.021  | 0.633  | 0.674  | 0.596   | 0.533   | 0.419  | 0.670  | 0.712   | 0.184   | 0.948  | 0.292  | 0.891   | 0.092   | 0.798   | 0.367   |
| MMP-9M         | N                       | 25                      | 25              | 25     | 25     | 25       | 25       | 25      | 25      | 25     | 25     | 25     | 25     | 25      | 25      | 25     | 25     | 25      | 25      | 25     | 25     | 25      | 25      | 25      | 25      |
|                | Correlation Coefficient | -0.199                  | -0.293          | 1.000  | 0.296  | 0.178    | 0.305    | 0.179   | 0.375   | -0.209 | -0.158 | .426*  | 0.167  | .458*   | 0.257   | 0.171  | 0.263  | -0.235  | -0.065  | 0.246  | 0.355  | 0.255   | -0.013  | -0.169  | -0.140  |
|                | Sig. (2-tailed)         | 0.339                   | 0.156           |        | 0.150  | 0.394    | 0.138    | 0.393   | 0.064   | 0.317  | 0.451  | 0.034  | 0.424  | 0.021   | 0.214   | 0.413  | 0.204  | 0.258   | 0.758   | 0.236  | 0.082  | 0.219   | 0.949   | 0.419   | 0.505   |
| MMP-9P         | N                       | 25                      | 25              | 25     | 25     | 25       | 25       | 25      | 25      | 25     | 25     | 25     | 25     | 25      | 25      | 25     | 25     | 25      | 25      | 25     | 25     | 25      | 25      | 25      | 25      |
|                | Correlation Coefficient | -0.190                  | 0.156           | 0.296  | 1.000  | 0.144    | 0.323    | 0.227   | .664**  | -0.033 | 0.128  | .435*  | .608** | 0.357   | .601**  | 0.287  | .790** | 0.086   | .677**  | 0.324  | 0.361  | .464*   | .576**  | -0.145  | 0.106   |
|                | Sig. (2-tailed)         | 0.362                   | 0.456           | 0.150  |        | 0.493    | 0.115    | 0.276   | 0.000   | 0.877  | 0.541  | 0.030  | 0.001  | 0.080   | 0.001   | 0.165  | 0.000  | 0.683   | 0.000   | 0.114  | 0.077  | 0.019   | 0.003   | 0.488   | 0.613   |
| TIMP-2 M       | N                       | 25                      | 25              | 25     | 25     | 25       | 25       | 25      | 25      | 25     | 25     | 25     | 25     | 25      | 25      | 25     | 25     | 25      | 25      | 25     | 25     | 25      | 25      | 25      | 25      |
|                | Correlation Coefficient | .484*                   | 0.198           | 0.178  | 0.144  | 1.000    | .676**   | 0.171   | 0.209   | .478*  | -0.103 | 0.289  | 0.070  | 0.349   | 0.266   | .473*  | 0.005  | -0.087  | 0.195   | 0.185  | .563** | .416*   | 0.054   | 0.356   | 0.116   |
|                | Sig. (2-tailed)         | 0.014                   | 0.344           | 0.394  | 0.493  |          | 0.000    | 0.413   | 0.316   | 0.016  | 0.625  | 0.161  | 0.739  | 0.088   | 0.199   | 0.017  | 0.980  | 0.681   | 0.350   | 0.376  | 0.003  | 0.038   | 0.797   | 0.081   | 0.582   |
| TIMP-2 P       | N                       | 25                      | 25              | 25     | 25     | 25       | 25       | 25      | 25      | 25     | 25     | 25     | 25     | 25      | 25      | 25     | 25     | 25      | 25      | 25     | 25     | 25      | 25      | 25      | 25      |
|                | Correlation Coefficient | -0.057                  | 0.035           | 0.305  | 0.323  | .676**   | 1.000    | -0.077  | 0.348   | 0.139  | -0.232 | .505** | 0.386  | .630**  | .613**  | 0.307  | 0.383  | -0.206  | 0.101   | 0.324  | .503*  | .523**  | 0.257   | 0.166   | 0.131   |
|                | Sig. (2-tailed)         | 0.788                   | 0.866           | 0.138  | 0.115  | 0.000    |          | 0.713   | 0.088   | 0.507  | 0.264  | 0.010  | 0.057  | 0.001   | 0.001   | 0.136  | 0.059  | 0.324   | 0.630   | 0.114  | 0.010  | 0.007   | 0.215   | 0.428   | 0.531   |
| TIMP-4M        | N                       | 25                      | 25              | 25     | 25     | 25       | 25       | 25      | 25      | 25     | 25     | 25     | 25     | 25      | 25      | 25     | 25     | 25      | 25      | 25     | 25     | 25      | 25      | 25      | 25      |
|                | Correlation Coefficient | 0.183                   | 0.029           | 0.179  | 0.227  | 0.171    | -0.077   | 1.000   | .431*   | .436*  | 0.239  | 0.058  | 0.268  | -0.194  | -0.007  | .540** | 0.133  | 0.195   | 0.320   | 0.020  | 0.369  | -0.082  | 0.072   | 0.104   | 0.005   |
|                | Sig. (2-tailed)         | 0.382                   | 0.892           | 0.393  | 0.276  | 0.413    | 0.713    |         | 0.031   | 0.029  | 0.250  | 0.781  | 0.195  | 0.353   | 0.975   | 0.005  | 0.527  | 0.351   | 0.119   | 0.924  | 0.070  | 0.699   | 0.732   | 0.620   | 0.982   |
| TIMP-4P        | N                       | 25                      | 25              | 25     | 25     | 25       | 25       | 25      | 25      | 25     | 25     | 25     | 25     | 25      | 25      | 25     | 25     | 25      | 25      | 25     | 25     | 25      | 25      | 25      | 25      |
|                | Correlation Coefficient | -0.168                  | -0.114          | 0.375  | .664** | 0.209    | 0.348    | .431*   | 1.000   | 0.059  | 0.238  | .457*  | .637** | .425*   | .638**  | .422*  | .749** | .402*   | .651**  | 0.395  | 0.382  | .404*   | .545**  | 0.037   | 0.066   |
|                | Sig. (2-tailed)         | 0.422                   | 0.587           | 0.064  | 0.000  | 0.316    | 0.088    | 0.031   |         | 0.781  | 0.109  | 0.022  | 0.001  | 0.034   | 0.001   | 0.036  | 0.000  | 0.046   | 0.000   | 0.051  | 0.059  | 0.045   | 0.005   | 0.859   | 0.752   |
| Shh M          | N                       | 25                      | 25              | 25     | 25     | 25       | 25       | 25      | 25      | 25     | 25     | 25     | 25     | 25      | 25      | 25     | 25     | 25      | 25      | 25     | 25     | 25      | 25      | 25      | 25      |
|                | Correlation Coefficient | .719**                  | .453*           | -0.209 | -0.033 | .478*    | 0.139    | .436*   | 0.059   | 1.000  | 0.325  | -0.078 | 0.127  | 0.035   | -0.021  | .549** | 0.085  | 0.121   | 0.232   | 0.052  | 0.342  | 0.175   | 0.237   | 0.299   | 0.395   |
|                | Sig. (2-tailed)         | 0.000                   | 0.023           | 0.317  | 0.877  | 0.016    | 0.507    | 0.029   | 0.781   |        | 0.113  | 0.710  | 0.544  | 0.867   | 0.921   | 0.005  | 0.687  | 0.565   | 0.264   | 0.805  | 0.094  | 0.403   | 0.254   | 0.146   | 0.051   |
| Shh P          | N                       | 25                      | 25              | 25     | 25     | 25       | 25       | 25      | 25      | 25     | 25     | 25     | 25     | 25      | 25      | 25     | 25     | 25      | 25      | 25     | 25     | 25      | 25      | 25      | 25      |
|                | Correlation Coefficient | 0.376                   | .460*           | -0.158 | 0.128  | -0.103   | -0.232   | 0.239   | 0.328   | 0.325  | 1.000  | -0.124 | 0.194  | -0.073  | 0.117   | 0.322  | 0.308  | .646**  | 0.350   | 0.114  | 0.047  | -0.056  | .527**  | 0.188   | 0.323   |
|                | Sig. (2-tailed)         | 0.064                   | 0.021           | 0.451  | 0.541  | 0.625    | 0.264    | 0.250   | 0.109   | 0.113  |        | 0.554  | 0.352  | 0.729   | 0.578   | 0.117  | 0.134  | 0.000   | 0.086   | 0.586  | 0.823  | 0.789   | 0.007   | 0.368   | 0.115   |
| IL-1 M         | N                       | 25                      | 25              | 25     | 25     | 25       | 25       | 25      | 25      | 25     | 25     | 25     | 25     | 25      | 25      | 25     | 25     | 25      | 25      | 25     | 25     | 25      | 25      | 25      | 25      |
|                | Correlation Coefficient | -0.220                  | -0.100          | .426*  | .435*  | 0.289    | .505**   | 0.058   | .457*   | -0.078 | -0.124 | 1.000  | .557** | .813**  | .762**  | 0.345  | .519** | -0.100  | 0.277   | 0.388  | 0.148  | .827**  | 0.352   | -0.094  | 0.099   |
|                | Sig. (2-tailed)         | 0.290                   | 0.633           | 0.034  | 0.030  | 0.161    | 0.010    | 0.781   | 0.022   | 0.710  | 0.554  |        | 0.004  | 0.000   | 0.000   | 0.091  | 0.008  | 0.634   | 0.180   | 0.055  | 0.480  | 0.000   | 0.084   | 0.656   | 0.636   |
| IL-1 P         | N                       | 25                      | 25              | 25     | 25     | 25       | 25       | 25      | 25      | 25     | 25     | 25     | 25     | 25      | 25      | 25     | 25     | 25      | 25      | 25     | 25     | 25      | 25      | 25      | 25      |
|                | Correlation Coefficient | -0.195                  | 0.088           | 0.167  | .608** | 0.070    | 0.386    | 0.268   | .637**  | 0.127  | 0.194  | .557** | 1.000  | 0.391   | .640**  | 0.381  | .692** | 0.067   | .583**  | 0.128  | 0.292  | .499**  | .466*   | -0.154  | 0.138   |
|                | Sig. (2-tailed)         | 0.349                   | 0.674           | 0.424  | 0.001  | 0.739    | 0.057    | 0.195   | 0.001   | 0.544  | 0.352  | 0.004  |        | 0.053   | 0.001   | 0.060  | 0.000  | 0.749   | 0.002   | 0.541  | 0.156  | 0.011   | 0.019   | 0.462   | 0.511   |
| IL-10 M        | N                       | 25                      | 25              | 25     | 25     | 25       | 25       | 25      | 25      | 25     | 25     | 25     | 25     | 25      | 25      | 25     | 25     | 25      | 25      | 25     | 25     | 25      | 25      | 25      | 25      |
|                | Correlation Coefficient | -0.150                  | -0.111          | .458*  | 0.357  | 0.349    | .630**   | -0.194  | .425*   | 0.035  | -0.073 | .813** | 0.391  | 1.000   | .801**  | 0.351  | .554*  | -0.038  | 0.099   | .611** | 0.233  | .841**  | .462*   | -0.128  | 0.150   |
|                | Sig. (2-tailed)         | 0.475                   | 0.596           | 0.021  | 0.080  | 0.088    | 0.001    | 0.353   | 0.034   | 0.867  | 0.729  | 0.000  | 0.053  |         | 0.000   | 0.086  | 0.004  | 0.855   | 0.639   | 0.001  | 0.262  | 0.000   | 0.020   | 0.543   | 0.476   |
| IL-10 P        | N                       | 25                      | 25              | 25     | 25     | 25       | 25       | 25      | 25      | 25     | 25     | 25     | 25     | 25      | 25      | 25     | 25     | 25      | 25      | 25     | 25     | 25      | 25      | 25      | 25      |
|                | Correlation Coefficient | -0.231                  | 0.131           | 0.257  | .601** | 0.266    | .613**   | -0.007  | .638**  | -0.021 | 0.117  | .762** | .640** | .801**  | 1.000   | .396*  | .751** | 0.175   | .417*   | .687** | 0.357  | .686**  | .687**  | -0.161  | 0.151   |
|                | Sig. (2-tailed)         | 0.267                   | 0.533           | 0.214  | 0.001  | 0.199    | 0.001    | 0.975   | 0.001   | 0.921  | 0.578  | 0.000  | 0.001  | 0.000   |         | 0.050  | 0.000  | 0.404   | 0.038   | 0.000  | 0.079  | 0.000   | 0.000   | 0.443   | 0.471   |
| NFKB M         | N                       | 25                      | 25              | 25     | 25     | 25       | 25       | 25      | 25      | 25     | 25     | 25     | 25     | 25      | 25      | 25     | 25     | 25      | 25      | 25     | 25     | 25      | 25      | 25      | 25      |
|                | Correlation Coefficient | .399*                   | 0.169           | 0.171  | 0.287  | .473*    | 0.307    | .540**  | .422*   | .549** | 0.322  | 0.345  | 0.381  | 0.351   | .396*   | 1.000  | 0.380  | 0.155   | 0.330   | .414*  | 0.350  | .418*   | 0.315   | 0.317   | 0.265   |
|                | Sig. (2-tailed)         | 0.048                   | 0.419           | 0.413  | 0.165  | 0.017    | 0.136    | 0.005   | 0.036   | 0.005  | 0.117  | 0.091  | 0.060  | 0.086   | 0.050   |        | 0.061  | 0.458   | 0.107   | 0.039  | 0.086  | 0.038   | 0.125   | 0.123   | 0.201   |
| NFKB P         | N                       | 25                      | 25              | 25     | 25     | 25       | 25       | 25      | 25      | 25     | 25     | 25     | 25     | 25      | 25      | 25     | 25     | 25      | 25      | 25     | 25     | 25      | 25      | 25      | 25      |
|                | Correlation Coefficient | -0.202                  | 0.090           | 0.263  | .790** | 0.005    | 0.383    | 0.133   | .749**  | 0.085  | 0.308  | .519** | .692** | <       |         |        |        |         |         |        |        |         |         |         |         |

Table S3

Children group correlations

|                |                         | MMP-2 M | MMP-2 P | MMP-9M | MMP-9P | TIMP-2 M | TIMP-2 P | TIMP-4M | TIMP-4P | Shh M | Shh P | IL-1 M | IL-1 P | IL-10 M | IL-10 P | NFKB M | NFKB P | Ki-67 M | VEGF M | VEGF P | HBD-2 M | HBD-2 P | HBD-4 M | HBD-4 P |        |
|----------------|-------------------------|---------|---------|--------|--------|----------|----------|---------|---------|-------|-------|--------|--------|---------|---------|--------|--------|---------|--------|--------|---------|---------|---------|---------|--------|
| Spearman's rho | MMP-2 M                 | 1.000   | .803    | 0.312  | .415   | .622     | .535     | .550    | 0.368   | .786  | .439  | .499   | 0.236  | .420    | 0.100   | .677   | .510   | .516    | 0.278  | 0.188  | 0.238   | .475    | 0.332   | 0.334   | 0.066  |
|                | Correlation Coefficient |         |         |        |        |          |          |         |         |       |       |        |        |         |         |        |        |         |        |        |         |         |         |         |        |
|                | Sig. (2-tailed)         |         | 0.000   | 0.129  | 0.039  | 0.001    | 0.006    | 0.004   | 0.071   | 0.000 | 0.028 | 0.011  | 0.256  | 0.037   | 0.633   | 0.000  | 0.009  | 0.008   | 0.178  | 0.367  | 0.253   | 0.016   | 0.105   | 0.103   | 0.753  |
| MMP-2 P        | N                       | 25      | 25      | 25     | 25     | 25       | 25       | 25      | 25      | 25    | 25    | 25     | 25     | 25      | 25      | 25     | 25     | 25      | 25     | 25     | 25      | 25      | 25      | 25      | 25     |
|                | Correlation Coefficient | .803    | 1.000   | 0.227  | .451   | .459     | .509     | .589    | 0.386   | .786  | .653  | 0.342  | 0.276  | 0.327   | 0.189   | .629   | .643   | .545    | 0.354  | 0.284  | 0.364   | 0.376   | .539    | 0.159   | 0.109  |
|                | Sig. (2-tailed)         | 0.000   |         | 0.276  | 0.024  | 0.021    | 0.009    | 0.002   | 0.057   | 0.000 | 0.000 | 0.094  | 0.182  | 0.110   | 0.365   | 0.001  | 0.001  | 0.005   | 0.082  | 0.169  | 0.073   | 0.064   | 0.005   | 0.448   | 0.604  |
| MMP-9M         | N                       | 25      | 25      | 25     | 25     | 25       | 25       | 25      | 25      | 25    | 25    | 25     | 25     | 25      | 25      | 25     | 25     | 25      | 25     | 25     | 25      | 25      | 25      | 25      | 25     |
|                | Correlation Coefficient | 0.312   | 0.227   | 1.000  | .710   | .436     | 0.346    | .481    | .528    | .473  | 0.316 | .549   | .604   | .418    | 0.332   | .522   | .531   | .560    | 0.373  | .561   | .525    | .562    | 0.225   | 0.127   | 0.027  |
|                | Sig. (2-tailed)         | 0.129   | 0.276   |        | 0.000  | 0.029    | 0.090    | 0.015   | 0.007   | 0.017 | 0.124 | 0.004  | 0.001  | 0.038   | 0.105   | 0.007  | 0.006  | 0.004   | 0.067  | 0.004  | 0.007   | 0.003   | 0.280   | 0.545   | 0.898  |
| MMP-9P         | N                       | 25      | 25      | 25     | 25     | 25       | 25       | 25      | 25      | 25    | 25    | 25     | 25     | 25      | 25      | 25     | 25     | 25      | 25     | 25     | 25      | 25      | 25      | 25      | 25     |
|                | Correlation Coefficient | .415    | .451    | .710   | 1.000  | .463     | .549     | .585    | .490    | .558  | .461  | .642   | .714   | .397    | .468    | .630   | .614   | .623    | .624   | .550   | .571    | .487    | 0.286   | 0.199   | 0.173  |
|                | Sig. (2-tailed)         | 0.039   | 0.024   | 0.000  |        | 0.020    | 0.005    | 0.002   | 0.013   | 0.004 | 0.020 | 0.001  | 0.000  | 0.050   | 0.018   | 0.001  | 0.001  | 0.001   | 0.001  | 0.004  | 0.003   | 0.014   | 0.165   | 0.340   | 0.409  |
| TIMP-2 M       | N                       | 25      | 25      | 25     | 25     | 25       | 25       | 25      | 25      | 25    | 25    | 25     | 25     | 25      | 25      | 25     | 25     | 25      | 25     | 25     | 25      | 25      | 25      | 25      | 25     |
|                | Correlation Coefficient | .622    | .459    | .436   | .463   | 1.000    | .685     | 0.220   | 0.186   | .537  | 0.287 | .597   | .407   | .488    | 0.206   | .504   | .462   | .420    | 0.118  | 0.302  | 0.294   | .505    | 0.277   | .409    | -0.097 |
|                | Sig. (2-tailed)         | 0.001   | 0.021   | 0.029  | 0.020  |          | 0.000    | 0.292   | 0.374   | 0.006 | 0.164 | 0.002  | 0.044  | 0.013   | 0.323   | 0.010  | 0.020  | 0.037   | 0.573  | 0.142  | 0.154   | 0.010   | 0.179   | 0.042   | 0.645  |
| TIMP-2 P       | N                       | 25      | 25      | 25     | 25     | 25       | 25       | 25      | 25      | 25    | 25    | 25     | 25     | 25      | 25      | 25     | 25     | 25      | 25     | 25     | 25      | 25      | 25      | 25      | 25     |
|                | Correlation Coefficient | .535    | .509    | 0.346  | .549   | .685     | 1.000    | 0.355   | 0.303   | .613  | .442  | .457   | .474   | .423    | 0.370   | .560   | .548   | .413    | 0.237  | .453   | .445    | .526    | 0.380   | 0.392   | 0.177  |
|                | Sig. (2-tailed)         | 0.006   | 0.009   | 0.090  | 0.005  | 0.000    |          | 0.081   | 0.140   | 0.001 | 0.027 | 0.022  | 0.017  | 0.035   | 0.069   | 0.004  | 0.005  | 0.040   | 0.253  | 0.023  | 0.026   | 0.007   | 0.061   | 0.052   | 0.398  |
| TIMP-4M        | N                       | 25      | 25      | 25     | 25     | 25       | 25       | 25      | 25      | 25    | 25    | 25     | 25     | 25      | 25      | 25     | 25     | 25      | 25     | 25     | 25      | 25      | 25      | 25      | 25     |
|                | Correlation Coefficient | .550    | .589    | .481   | .585   | 0.220    | 0.355    | 1.000   | .841    | .681  | .566  | .634   | .575   | .522    | .605    | .738   | .485   | .569    | .590   | .492   | .690    | .608    | .500    | -0.104  | 0.069  |
|                | Sig. (2-tailed)         | 0.004   | 0.002   | 0.015  | 0.002  | 0.292    | 0.081    |         | 0.000   | 0.000 | 0.003 | 0.001  | 0.003  | 0.008   | 0.001   | 0.000  | 0.014  | 0.003   | 0.002  | 0.012  | 0.000   | 0.001   | 0.011   | 0.619   | 0.745  |
| TIMP-4P        | N                       | 25      | 25      | 25     | 25     | 25       | 25       | 25      | 25      | 25    | 25    | 25     | 25     | 25      | 25      | 25     | 25     | 25      | 25     | 25     | 25      | 25      | 25      | 25      | 25     |
|                | Correlation Coefficient | 0.368   | 0.386   | .528   | .490   | 0.186    | 0.303    | .841    | 1.000   | .475  | 0.367 | .641   | .663   | .638    | .721    | .654   | .457   | .481    | .414   | .628   | .678    | .568    | .397    | -0.185  | 0.018  |
|                | Sig. (2-tailed)         | 0.071   | 0.057   | 0.007  | 0.013  | 0.374    | 0.140    | 0.000   |         | 0.016 | 0.071 | 0.001  | 0.000  | 0.001   | 0.000   | 0.000  | 0.022  | 0.015   | 0.040  | 0.001  | 0.000   | 0.003   | 0.049   | 0.376   | 0.930  |
| Shh M          | N                       | 25      | 25      | 25     | 25     | 25       | 25       | 25      | 25      | 25    | 25    | 25     | 25     | 25      | 25      | 25     | 25     | 25      | 25     | 25     | 25      | 25      | 25      | 25      | 25     |
|                | Correlation Coefficient | .786    | .786    | .473   | .558   | .537     | .613     | .681    | .475    | 1.000 | .813  | .472   | 0.393  | .444    | 0.232   | .753   | .702   | .803    | .575   | 0.278  | 0.384   | .539    | .515    | .437    | 0.278  |
|                | Sig. (2-tailed)         | 0.000   | 0.000   | 0.017  | 0.004  | 0.006    | 0.001    | 0.000   | 0.016   |       | 0.000 | 0.017  | 0.052  | 0.026   | 0.264   | 0.000  | 0.000  | 0.000   | 0.003  | 0.179  | 0.058   | 0.005   | 0.008   | 0.029   | 0.178  |
| Shh P          | N                       | 25      | 25      | 25     | 25     | 25       | 25       | 25      | 25      | 25    | 25    | 25     | 25     | 25      | 25      | 25     | 25     | 25      | 25     | 25     | 25      | 25      | 25      | 25      | 25     |
|                | Correlation Coefficient | .439    | .653    | 0.316  | .461   | 0.287    | .442     | .566    | 0.367   | .813  | 1.000 | 0.320  | 0.271  | 0.197   | 0.273   | .570   | .530   | .746    | .667   | 0.152  | 0.278   | 0.283   | .428    | 0.367   | 0.284  |
|                | Sig. (2-tailed)         | 0.028   | 0.000   | 0.124  | 0.020  | 0.164    | 0.027    | 0.003   | 0.071   | 0.000 |       | 0.119  | 0.191  | 0.344   | 0.187   | 0.003  | 0.006  | 0.000   | 0.000  | 0.467  | 0.178   | 0.171   | 0.033   | 0.071   | 0.169  |
| IL-1 M         | N                       | 25      | 25      | 25     | 25     | 25       | 25       | 25      | 25      | 25    | 25    | 25     | 25     | 25      | 25      | 25     | 25     | 25      | 25     | 25     | 25      | 25      | 25      | 25      | 25     |
|                | Correlation Coefficient | .499    | 0.342   | .549   | .642   | .597     | .457     | .634    | .641    | .472  | 0.320 | 1.000  | .716   | .709    | .720    | .827   | .406   | .597    | .493   | .510   | .574    | .700    | 0.377   | 0.207   | 0.101  |
|                | Sig. (2-tailed)         | 0.011   | 0.094   | 0.004  | 0.001  | 0.002    | 0.022    | 0.001   | 0.001   | 0.017 | 0.119 |        | 0.000  | 0.000   | 0.000   | 0.000  | 0.044  | 0.002   | 0.012  | 0.009  | 0.003   | 0.000   | 0.063   | 0.320   | 0.632  |
| IL-1 P         | N                       | 25      | 25      | 25     | 25     | 25       | 25       | 25      | 25      | 25    | 25    | 25     | 25     | 25      | 25      | 25     | 25     | 25      | 25     | 25     | 25      | 25      | 25      | 25      | 25     |
|                | Correlation Coefficient | 0.236   | 0.276   | .604   | .714   | .407     | .474     | .575    | .663    | 0.393 | 0.271 | .716   | 1.000  | .620    | .694    | .647   | .510   | .442    | .441   | .664   | .714    | .630    | 0.369   | 0.075   | 0.212  |
|                | Sig. (2-tailed)         | 0.256   | 0.182   | 0.001  | 0.000  | 0.044    | 0.017    | 0.003   | 0.000   | 0.052 | 0.191 | 0.000  |        | 0.001   | 0.000   | 0.000  | 0.009  | 0.027   | 0.027  | 0.000  | 0.000   | 0.001   | 0.069   | 0.722   | 0.310  |
| IL-10 M        | N                       | 25      | 25      | 25     | 25     | 25       | 25       | 25      | 25      | 25    | 25    | 25     | 25     | 25      | 25      | 25     | 25     | 25      | 25     | 25     | 25      | 25      | 25      | 25      | 25     |
|                | Correlation Coefficient | .420    | 0.327   | .418   | .397   | .488     | .423     | .522    | .638    | .444  | 0.197 | .709   | .620   | 1.000   | .668    | .677   | .536   | .558    | .437   | .559   | .422    | .828    | .677    | 0.082   | 0.140  |
|                | Sig. (2-tailed)         | 0.037   | 0.110   | 0.038  | 0.050  | 0.013    | 0.035    | 0.008   | 0.001   | 0.026 | 0.344 | 0.000  | 0.001  |         | 0.000   | 0.000  | 0.006  | 0.004   | 0.029  | 0.004  | 0.036   | 0.000   | 0.000   | 0.698   | 0.506  |
| IL-10 P        | N                       | 25      | 25      | 25     | 25     | 25       | 25       | 25      | 25      | 25    | 25    | 25     | 25     | 25      | 25      | 25     | 25     | 25      | 25     | 25     | 25      | 25      | 25      | 25      | 25     |
|                | Correlation Coefficient | 0.100   | 0.189   | 0.332  | .468   | 0.206    | 0.370    | .605    | .721    | 0.232 | 0.273 | .720   | .694   | .668    | 1.000   | .602   | 0.316  | 0.376   | 0.372  | .696   | .674    | .592    | .516    | -0.163  | 0.198  |
|                | Sig. (2-tailed)         | 0.633   | 0.365   | 0.105  | 0.018  | 0.323    | 0.069    | 0.001   | 0.000   | 0.264 | 0.187 | 0.000  | 0.000  | 0.000   |         | 0.001  | 0.124  | 0.064   | 0.067  | 0.000  | 0.000   | 0.002   | 0.008   | 0.438   | 0.343  |
| NFKB M         | N                       | 25      | 25      | 25     | 25     | 25       | 25       | 25      | 25      | 25    | 25    | 25     | 25     | 25      | 25      | 25     | 25     | 25      | 25     | 25     | 25      | 25      | 25      | 25      | 25     |
|                | Correlation Coefficient | .677    | .629    | .522   | .630   | .504     | .560     | .738    | .654    | .753  | .570  | .827   | .647   | .677    | .602    | 1.000  | .680   | .726    | .588   | .595   | .614    | .750    | .570    | 0.188   | 0.305  |
|                | Sig. (2-tailed)         | 0.000   | 0.001   | 0.007  | 0.001  | 0.010    | 0.004    | 0.000   | 0.000   | 0.000 | 0.003 | 0.000  | 0.000  | 0.000   | 0.001   |        | 0.000  | 0.000   | 0.002  | 0.002  | 0.001   | 0.000   | 0.003   | 0.368   | 0.138  |
| NFKB P         | N                       | 25      | 25      | 25     | 25     | 25       | 25       | 25      | 25      | 25    | 25    | 25     | 25     | 25      | 25      | 25     | 25     | 25      | 25     | 25     | 25      | 25      | 25      | 25      | 25     |
|                | Correlation Coefficient | .510    | .643    | .531   | .614   | .462     | .548     | .485    | .457    | .702  | .530  | .406   | .510   | .536    | 0.316   | .680   |        |         |        |        |         |         |         |         |        |

Table S4

Control group correlations

| Spearman's rho |                         | MMP-2 M | MMP-2 P | MMP-9M | MMP-9P | TIMP-2 M | TIMP-2 P | TIMP-4M | TIMP-4P | Shh M  | Shh P  | IL-1 M | IL-1 P | IL-10 M | IL-10 P | NFKB M | NFKB P | Ki-67 M | Ki-67 P | VEGF M | VEGF P | HBD-2 P | HBD-4 M | HBD-4 P |        |
|----------------|-------------------------|---------|---------|--------|--------|----------|----------|---------|---------|--------|--------|--------|--------|---------|---------|--------|--------|---------|---------|--------|--------|---------|---------|---------|--------|
| MMP-2 M        | Correlation Coefficient | 1.000   | 0.520   | 0.472  | -0.271 | .833*    | 0.396    | 0.547   | 0.416   | 0.593  | 0.385  | 0.009  | -.808* | 0.346   | -0.061  | .785*  | 0.591  | 0.644   | 0.644   | 0.577  | 0.448  | 0.664   | 0.668   | 0.023   | -0.010 |
|                | Sig. (2-tailed)         |         | 0.232   | 0.285  | 0.557  | 0.020    | 0.380    | 0.204   | 0.353   | 0.161  | 0.393  | 0.984  | 0.028  | 0.447   | 0.897   | 0.036  | 0.163  | 0.118   | 0.118   | 0.175  | 0.314  | 0.104   | 0.101   | 0.962   | 0.983  |
|                | N                       | 7       | 7       | 7      | 7      | 7        | 7        | 7       | 7       | 7      | 7      | 7      | 7      | 7       | 7       | 7      | 7      | 7       | 7       | 7      | 7      | 7       | 7       | 7       | 7      |
| MMP-2 P        | Correlation Coefficient | 0.520   | 1.000   | 0.540  | 0.113  | 0.312    | 0.683    | 0.424   | 0.228   | 0.312  | 0.569  | 0.105  | -0.471 | -0.105  | -0.342  | 0.525  | 0.535  | 0.258   | 0.258   | 0.432  | 0.321  | 0.629   | 0.441   | -0.509  | -0.569 |
|                | Sig. (2-tailed)         | 0.232   |         | 0.211  | 0.810  | 0.496    | 0.091    | 0.344   | 0.623   | 0.496  | 0.182  | 0.823  | 0.286  | 0.823   | 0.453   | 0.227  | 0.216  | 0.576   | 0.576   | 0.333  | 0.483  | 0.130   | 0.322   | 0.243   | 0.182  |
|                | N                       | 7       | 7       | 7      | 7      | 7        | 7        | 7       | 7       | 7      | 7      | 7      | 7      | 7       | 7       | 7      | 7      | 7       | 7       | 7      | 7      | 7       | 7       | 7       | 7      |
| MMP-9M         | Correlation Coefficient | 0.472   | 0.540   | 1.000  | 0.292  | 0.683    | 0.601    | 0.726   | .769*   | .924** | .896** | -0.612 | -0.153 | 0.690   | 0.474   | .777*  | .772*  | 0.251   | 0.251   | 0.670  | 0.535  | 0.728   | 0.204   | 0.024   | -0.011 |
|                | Sig. (2-tailed)         | 0.285   | 0.211   |        | 0.525  | 0.091    | 0.154    | 0.065   | 0.043   | 0.003  | 0.006  | 0.144  | 0.744  | 0.086   | 0.282   | 0.040  | 0.042  | 0.587   | 0.587   | 0.100  | 0.216  | 0.063   | 0.661   | 0.960   | 0.982  |
|                | N                       | 7       | 7       | 7      | 7      | 7        | 7        | 7       | 7       | 7      | 7      | 7      | 7      | 7       | 7       | 7      | 7      | 7       | 7       | 7      | 7      | 7       | 7       | 7       | 7      |
| MMP-9P         | Correlation Coefficient | -0.271  | 0.113   | 0.292  | 1.000  | -0.050   | 0.231    | 0.429   | 0.231   | 0.201  | 0.231  | -0.557 | 0.159  | 0.152   | 0.231   | 0.223  | 0.434  | -0.611  | -0.611  | 0.156  | -0.062 | 0.152   | -0.128  | 0.516   | 0.385  |
|                | Sig. (2-tailed)         | 0.557   | 0.810   | 0.525  |        | 0.915    | 0.619    | 0.336   | 0.619   | 0.666  | 0.619  | 0.194  | 0.733  | 0.745   | 0.619   | 0.631  | 0.331  | 0.145   | 0.145   | 0.738  | 0.895  | 0.745   | 0.785   | 0.236   | 0.394  |
|                | N                       | 7       | 7       | 7      | 7      | 7        | 7        | 7       | 7       | 7      | 7      | 7      | 7      | 7       | 7       | 7      | 7      | 7       | 7       | 7      | 7      | 7       | 7       | 7       | 7      |
| TIMP-2 M       | Correlation Coefficient | .833*   | 0.312   | 0.683  | -0.050 | 1.000    | 0.152    | 0.585   | 0.639   | .824** | 0.629  | -0.224 | -0.441 | 0.598   | 0.183   | .925** | 0.619  | 0.564   | 0.564   | 0.433  | 0.238  | 0.495   | 0.314   | 0.249   | 0.122  |
|                | Sig. (2-tailed)         | 0.020   | 0.496   | 0.091  | 0.915  |          | 0.745    | 0.168   | 0.122   | 0.023  | 0.130  | 0.629  | 0.322  | 0.156   | 0.695   | 0.003  | 0.138  | 0.188   | 0.188   | 0.332  | 0.607  | 0.258   | 0.492   | 0.590   | 0.795  |
|                | N                       | 7       | 7       | 7      | 7      | 7        | 7        | 7       | 7       | 7      | 7      | 7      | 7      | 7       | 7       | 7      | 7      | 7       | 7       | 7      | 7      | 7       | 7       | 7       | 7      |
| TIMP-2 P       | Correlation Coefficient | 0.396   | 0.683   | 0.601  | 0.231  | 0.152    | 1.000    | 0.620   | 0.333   | 0.456  | 0.433  | -0.461 | -0.483 | 0.338   | 0.300   | 0.338  | 0.658  | 0.000   | 0.000   | .885** | .845*  | .921**  | 0.645   | -0.149  | -0.033 |
|                | Sig. (2-tailed)         | 0.380   | 0.091   | 0.154  | 0.619  | 0.745    |          | 0.137   | 0.465   | 0.303  | 0.331  | 0.298  | 0.272  | 0.459   | 0.513   | 0.459  | 0.108  | 1.000   | 1.000   | 0.008  | 0.017  | 0.003   | 0.117   | 0.750   | 0.943  |
|                | N                       | 7       | 7       | 7      | 7      | 7        | 7        | 7       | 7       | 7      | 7      | 7      | 7      | 7       | 7       | 7      | 7      | 7       | 7       | 7      | 7      | 7       | 7       | 7       | 7      |
| TIMP-4M        | Correlation Coefficient | 0.547   | 0.424   | 0.726  | 0.429  | 0.585    | 0.620    | 1.000   | .868*   | .811*  | 0.393  | -0.705 | -0.599 | 0.476   | 0.310   | .781*  | .990** | 0.328   | 0.328   | 0.706  | 0.641  | 0.724   | 0.240   | 0.277   | 0.434  |
|                | Sig. (2-tailed)         | 0.204   | 0.344   | 0.065  | 0.336  | 0.168    | 0.137    |         | 0.011   | 0.027  | 0.383  | 0.077  | 0.155  | 0.280   | 0.499   | 0.038  | 0.000  | 0.472   | 0.472   | 0.076  | 0.121  | 0.066   | 0.604   | 0.547   | 0.330  |
|                | N                       | 7       | 7       | 7      | 7      | 7        | 7        | 7       | 7       | 7      | 7      | 7      | 7      | 7       | 7       | 7      | 7      | 7       | 7       | 7      | 7      | 7       | 7       | 7       | 7      |
| TIMP-4P        | Correlation Coefficient | 0.416   | 0.228   | .769*  | 0.231  | 0.639    | 0.333    | .868*   | 1.000   | .882** | 0.456  | -0.686 | -0.322 | 0.522   | 0.367   | 0.747  | .845*  | 0.529   | 0.529   | 0.464  | 0.491  | 0.471   | -0.129  | 0.149   | 0.344  |
|                | Sig. (2-tailed)         | 0.353   | 0.623   | 0.043  | 0.619  | 0.122    | 0.465    | 0.011   |         | 0.009  | 0.304  | 0.089  | 0.481  | 0.229   | 0.419   | 0.053  | 0.017  | 0.222   | 0.222   | 0.295  | 0.264  | 0.286   | 0.783   | 0.750   | 0.449  |
|                | N                       | 7       | 7       | 7      | 7      | 7        | 7        | 7       | 7       | 7      | 7      | 7      | 7      | 7       | 7       | 7      | 7      | 7       | 7       | 7      | 7      | 7       | 7       | 7       | 7      |
| Shh M          | Correlation Coefficient | 0.593   | 0.312   | .924** | 0.201  | .824*    | 0.456    | .811*   | .882**  | 1.000  | 0.730  | -0.682 | -0.294 | .794*   | 0.548   | .851*  | .819*  | 0.403   | 0.403   | 0.674  | 0.562  | 0.682   | 0.196   | 0.249   | 0.274  |
|                | Sig. (2-tailed)         | 0.161   | 0.496   | 0.003  | 0.666  | 0.023    | 0.303    | 0.027   | 0.009   |        | 0.062  | 0.091  | 0.522  | 0.033   | 0.203   | 0.015  | 0.024  | 0.371   | 0.371   | 0.097  | 0.189  | 0.091   | 0.673   | 0.590   | 0.552  |
|                | N                       | 7       | 7       | 7      | 7      | 7        | 7        | 7       | 7       | 7      | 7      | 7      | 7      | 7       | 7       | 7      | 7      | 7       | 7       | 7      | 7      | 7       | 7       | 7       | 7      |
| Shh P          | Correlation Coefficient | 0.385   | 0.569   | .896** | 0.231  | 0.629    | 0.433    | 0.393   | 0.456   | 0.730  | 1.000  | -0.317 | 0.081  | 0.584   | 0.333   | 0.665  | 0.480  | 0.088   | 0.088   | 0.464  | 0.240  | 0.563   | 0.215   | -0.075  | -0.300 |
|                | Sig. (2-tailed)         | 0.393   | 0.182   | 0.006  | 0.619  | 0.130    | 0.331    | 0.383   | 0.304   | 0.062  |        | 0.488  | 0.864  | 0.169   | 0.465   | 0.103  | 0.276  | 0.851   | 0.851   | 0.295  | 0.604  | 0.188   | 0.643   | 0.874   | 0.513  |
|                | N                       | 7       | 7       | 7      | 7      | 7        | 7        | 7       | 7       | 7      | 7      | 7      | 7      | 7       | 7       | 7      | 7      | 7       | 7       | 7      | 7      | 7       | 7       | 7       | 7      |
| IL-1 M         | Correlation Coefficient | 0.009   | 0.105   | -0.612 | -0.557 | -0.224   | -0.461   | -0.705  | -0.686  | -0.682 | -0.317 | 1.000  | 0.000  | -0.736  | -.829*  | -0.330 | -0.644 | 0.163   | 0.163   | -0.622 | -0.596 | -0.500  | 0.000   | -0.527  | -0.676 |
|                | Sig. (2-tailed)         | 0.984   | 0.823   | 0.144  | 0.194  | 0.629    | 0.298    | 0.077   | 0.089   | 0.091  | 0.488  |        | 1.000  | 0.059   | 0.021   | 0.470  | 0.118  | 0.728   | 0.728   | 0.136  | 0.158  | 0.253   | 1.000   | 0.225   | 0.096  |
|                | N                       | 7       | 7       | 7      | 7      | 7        | 7        | 7       | 7       | 7      | 7      | 7      | 7      | 7       | 7       | 7      | 7      | 7       | 7       | 7      | 7      | 7       | 7       | 7       | 7      |
| IL-1 P         | Correlation Coefficient | -.808*  | -0.471  | -0.153 | 0.159  | -0.441   | -0.483   | -0.599  | -0.322  | -0.294 | 0.081  | 0.000  | 1.000  | 0.000   | 0.242   | -0.519 | -0.605 | -0.548  | -0.548  | -0.535 | -0.529 | -0.593  | -0.624  | 0.000   | -0.161 |
|                | Sig. (2-tailed)         | 0.028   | 0.286   | 0.744  | 0.733  | 0.322    | 0.272    | 0.155   | 0.481   | 0.522  | 0.864  | 1.000  |        | 1.000   | 0.602   | 0.232  | 0.150  | 0.203   | 0.203   | 0.216  | 0.222  | 0.160   | 0.135   | 1.000   | 0.730  |
|                | N                       | 7       | 7       | 7      | 7      | 7        | 7        | 7       | 7       | 7      | 7      | 7      | 7      | 7       | 7       | 7      | 7      | 7       | 7       | 7      | 7      | 7       | 7       | 7       | 7      |
| IL-10 M        | Correlation Coefficient | 0.346   | -0.105  | 0.690  | 0.152  | 0.598    | 0.338    | 0.476   | 0.522   | .794*  | 0.584  | -0.736 | 0.000  | 1.000   | .891**  | 0.481  | 0.452  | 0.000   | 0.000   | 0.680  | 0.539  | 0.575   | 0.317   | 0.527   | 0.471  |
|                | Sig. (2-tailed)         | 0.447   | 0.823   | 0.086  | 0.745  | 0.156    | 0.459    | 0.280   | 0.229   | 0.033  | 0.169  | 0.059  | 1.000  |         | 0.007   | 0.274  | 0.309  | 1.000   | 1.000   | 0.093  | 0.212  | 0.176   | 0.488   | 0.225   | 0.286  |
|                | N                       | 7       | 7       | 7      | 7      | 7        | 7        | 7       | 7       | 7      | 7      | 7      | 7      | 7       | 7       | 7      | 7      | 7       | 7       | 7      | 7      | 7       | 7       | 7       | 7      |
| IL-10 P        | Correlation Coefficient | -0.061  | -0.342  | 0.474  | 0.231  | 0.183    | 0.300    | 0.310   | 0.367   | 0.548  | 0.333  | -.829* | 0.242  | .891**  | 1.000   | 0.092  | 0.250  | -0.265  | -0.265  | 0.569  | 0.532  | 0.399   | 0.129   | 0.522   | 0.567  |
|                | Sig. (2-tailed)         | 0.897   | 0.453   | 0.282  | 0.619  | 0.695    | 0.513    | 0.499   | 0.419   | 0.203  | 0.465  | 0.021  | 0.602  | 0.007   |         | 0.844  | 0.588  | 0.566   | 0.566   | 0.182  | 0.219  | 0.375   | 0.783   | 0.230   | 0.185  |
|                | N                       | 7       | 7       | 7      | 7      | 7        | 7        | 7       | 7       | 7      | 7      | 7      | 7      | 7       | 7       | 7      | 7      | 7       | 7       | 7      | 7      | 7       | 7       | 7       | 7      |
| NFKB M         | Correlation Coefficient | .785*   | 0.525   | .777*  | 0.223  | .925**   | 0.338    | .781*   | 0.747   | .851*  | 0.665  | -0.330 | -0.519 | 0.481   | 0.092   | 1.000  | .827*  | 0.488   | 0.488   | 0.495  | 0.289  | 0.594   | 0.278   | 0.206   | 0.113  |
|                | Sig. (2-tailed)         | 0.036   | 0.227   | 0.040  | 0.631  | 0.003    | 0.459    | 0.038   | 0.053   | 0.015  | 0.103  | 0.470  | 0.232  | 0.274   | 0.844   |        | 0.022  | 0.267   | 0.267   | 0.258  | 0.530  | 0.159   | 0.547   | 0.658   | 0.810  |
|                | N                       | 7       | 7       | 7      | 7      | 7        | 7        | 7       | 7       | 7      | 7      | 7      | 7      | 7       | 7       | 7      | 7      | 7       | 7       | 7      | 7      | 7       | 7       | 7       | 7      |
| NFKB P         | Correlation Coefficient | 0.591   | 0.535   | .772*  | 0.434  | 0.619    | 0.658    | .990**  | .845*   | .819*  | 0.480  | -0.644 | -0.605 | 0.452   | 0.250   | .827*  | 1.000  | 0.331   | 0.331   | 0.713  | 0.618  | .760*   | 0.283   | 0.210   | 0.324  |
|                | Sig. (2-tailed)         | 0.163   | 0.216   | 0.042  | 0.33   |          |          |         |         |        |        |        |        |         |         |        |        |         |         |        |        |         |         |         |        |
